# Supplementary material for: Evaluate the impact of maternal smoking during pregnancy on sleep duration in female offspring
Source: Research Square preprint supplement (doi:10.21203/rs.3.rs-940203/v1), 2021-10-01
Supplement: Supplementary file 1 [file c9d2ecc75e8bb7ffe2cd9fb3.docx]

**TableS1** Genome-wide gene-environment interaction study results between smoking during pregnancy and long sleep duration in female offspring

| **CHR** | **SNP** | **GENE** | **T** | ***P-value*** |
| --- | --- | --- | --- | --- |
| 5 | rs78942972 |  | 5.04 | 4.77×10-7 |
| 15 | rs6496187 |  | 4.86 | 1.16×10-6 |
| 20 | rs809587 |  | -4.86 | 1.18×10-6 |
| 6 | rs982918 |  | 4.78 | 1.74×10-6 |
| 5 | rs6867995 |  | 4.77 | 1.88×10-6 |
| 6 | rs9342302 |  | 4.77 | 1.89×10-6 |
| 6 | rs1532498 |  | 4.76 | 1.90×10-6 |
| 5 | rs7717026 |  | 4.76 | 1.96×10-6 |
| 11 | rs9804576 |  | -4.76 | 1.97×10-6 |
| 20 | rs775124 |  | -4.76 | 1.98×10-6 |
| 11 | rs9804431 |  | -4.74 | 2.14×10-6 |
| 2 | rs7422672 |  | -4.72 | 2.40×10-6 |
| 5 | rs2106547 |  | 4.72 | 2.42×10-6 |
| 5 | rs2963875 |  | 4.70 | 2.54×10-6 |
| 5 | rs6883282 |  | 4.70 | 2.56×10-6 |
| 5 | rs4702653 |  | 4.70 | 2.64×10-6 |
| 5 | rs2106546 |  | 4.68 | 2.84×10-6 |
| 6 | rs9359959 |  | 4.68 | 2.90×10-6 |
| 6 | rs7755962 |  | 4.67 | 2.98×10-6 |
| 6 | rs143584436 |  | 4.67 | 2.99×10-6 |
| 6 | rs9362920 |  | 4.67 | 2.99×10-6 |
| 6 | rs9345183 |  | 4.67 | 2.99×10-6 |
| 6 | rs3932178 |  | 4.67 | 3.02×10-6 |
| 6 | rs6914317 |  | 4.65 | 3.28×10-6 |
| 5 | rs7710554 |  | 4.65 | 3.28×10-6 |
| 6 | rs12524257 |  | 4.65 | 3.39×10-6 |
| 6 | rs4707703 |  | 4.65 | 3.40×10-6 |
| 5 | rs79357406 |  | 4.64 | 3.42×10-6 |
| 6 | rs7766876 |  | 4.64 | 3.47×10-6 |
| 6 | rs7766782 |  | 4.64 | 3.47×10-6 |
| 6 | rs6899509 |  | 4.64 | 3.47×10-6 |
| 6 | rs6454884 |  | 4.64 | 3.55×10-6 |
| 6 | rs9345184 |  | 4.63 | 3.63×10-6 |
| 15 | rs6496186 |  | 4.63 | 3.67×10-6 |
| 5 | rs4702655 |  | 4.63 | 3.67×10-6 |
| 11 | rs565247824 |  | -4.62 | 3.76×10-6 |
| 5 | rs1366628 |  | 4.62 | 3.83×10-6 |
| 5 | rs1304136 |  | 4.62 | 3.87×10-6 |
| 6 | rs13216972 |  | 4.61 | 3.94×10-6 |
| 6 | rs4707702 |  | 4.61 | 4.05×10-6 |
| 6 | rs6920127 |  | 4.60 | 4.17×10-6 |
| 6 | rs9351290 |  | 4.60 | 4.22×10-6 |
| 20 | rs11086619 |  | 4.60 | 4.25×10-6 |
| 6 | rs13201078 |  | 4.60 | 4.26×10-6 |
| 17 | rs2429953 |  | 4.58 | 4.57×10-6 |
| 20 | rs752522158 |  | -4.58 | 4.65×10-6 |
| 12 | rs61925708 | ANO6 | 4.53 | 5.89×10-6 |
| 15 | rs4965137 |  | 4.49 | 7.10×10-6 |
| 15 | rs12915633 |  | 4.48 | 7.62×10-6 |
| 11 | rs1117854 |  | -4.46 | 8.02×10-6 |
| 6 | rs4707700 |  | 4.45 | 8.61×10-6 |
| 15 | rs7170374 |  | 4.45 | 8.74×10-6 |
| 15 | rs1503356 |  | 4.44 | 9.18×10-6 |
| 17 | rs59558092 | CDC42EP4 | 4.43 | 9.40×10-6 |
| 13 | rs11840088 | GPC5 | -4.43 | 9.44×10-6 |
| 17 | rs7216556 |  | 4.42 | 9.96×10-6 |

Note: CHR, chromosome
